# Supplementary material for: Association between NLRP3 rs10754558 and CARD8 rs2043211 Variants and Susceptibility to Chronic Kidney Disease
Source: MDPI journal article supplement (doi:10.3390/ijms24044184), 2023-02-20
Supplement: s1 [file s1]

**Table S1.** Clinical characteristics of KTRs, Dialysis and CKD stage 3-5 patients.

|                             | <b>KTRs</b><br>(n = 143) | <b>Dialysis</b><br>(n = 126) | <b>CKD</b><br>(n = 34) |
|-----------------------------|--------------------------|------------------------------|------------------------|
| Age (years)                 | 55.87 ± 12.23            | 66.51 ± 15.75                | 71.97 ± 9.99           |
| Sex (Males)                 | 92 (64.34)               | 83 (65.87)                   | 24 (70.59)             |
| Creatinine (mg/dl)          | 1.83 ± 1.30              | 8.84 ± 3.50                  | 2.17 ± 0.79            |
| eGFR (ml/min)               | 50.90 ± 25.69            | 9.19 ± 15.79                 | 31.85 ± 11.66          |
| Glucose (mg/dl)             | 95.02 ± 31.32            | 114.13 ± 42.22               | 127.14 ± 41.54         |
| Urea (mg/dl)                | 44.98 ± 28.58            | 61.79 ± 20.38                | 82.15 ± 46.82          |
| Uric Acid (mg/dl)           | 5.97 ± 1.70              | 5.85 ± 1.23                  | 5.89 ± 1.35            |
| Ca (mg/dl)                  | 9.55 ± 0.86              | 9.31 ± 0.81                  | 9.22 ± 0.61            |
| Ph (mg/dl)                  | 3.53 ± 1.01              | 4.78 ± 1.89                  | 3.58 ± 0.86            |
| Total Cholesterol (mg/dl)   | 193.66 ± 46.18           | 164.19 ± 48.49               | 171.77 ± 39.78         |
| Tryglicerid (mg/dl)         | 179.72 ± 93.38           | 171.96 ± 96.41               | 177.59 ± 162.96        |
| HDL Cholesterol (mg/dl)     | 54.26 ± 16.95            | 44.78 ± 17.05                | 41.62 ± 15.98          |
| LDL Cholesterol (mg/dl)     | 103.15 ± 39.32           | 85.52 ± 40.69                | 86.60 ± 33.64          |
| Ferritinemy (ng/ml)         | 104.00 (39.00 - 200.00)  | 298.50 (63.50 - 598.25)      | 49.50 (31.75 - 96.25)  |
| CRP (mg/l)                  | 5.00 (1.40 - 10.77)      | 7.18 (1.10 - 14.33)          | 0.60 (0.20 - 6.95)     |
| serum Albumin (gr/dl)       | 3.93 ± 0.48              | 3.31 ± 0.50                  | 4.18 ± 0.77            |
| Hgb (gr/dl)                 | 12.86 ± 1.72             | 11.58 ± 1.83                 | 12.62 ± 2.12           |
| Type 2 Diabetes             | 17 (11.89)               | 30 (23.81)                   | 16 (47.06)             |
| Hypertension                | 114 (79.72)              | 81 (64.29)                   | 14 (41.18)             |
| Cause CKD (%)               |                          |                              |                        |
| Diabetic Nephropathy        | 6 (4.20)                 | 28 (22.22)                   | 14 (41.18)             |
| Glomerular                  | 95 (66.43)               | 10 (7.94)                    | 14 (41.18)             |
| Other                       | 15 (10.49)               | 7 (5.56)                     | 2 (5.88)               |
| Unknown                     | 27 (18.88)               | 81 (64.29)                   | 0 (0.00)               |
| <i>NLRP3 rs10754558 (%)</i> |                          |                              |                        |
| CC                          | 33 (23.08)               | 33 (26.19)                   | 11 (32.35)             |
| CG                          | 21 (14.69)               | 17 (13.49)                   | 6 (17.65)              |
| GG                          | 89 (62.24)               | 76 (60.32)                   | 17 (50.00)             |
| <i>CARD8 rs2043211 (%)</i>  |                          |                              |                        |
| AA                          | 23 (16.08)               | 12 (9.52)                    | 4 (11.76)              |
| AT                          | 25 (17.48)               | 62 (49.21)                   | 12 (35.29)             |
| TT                          | 95 (66.43)               | 52 (41.27)                   | 18 (52.94)             |

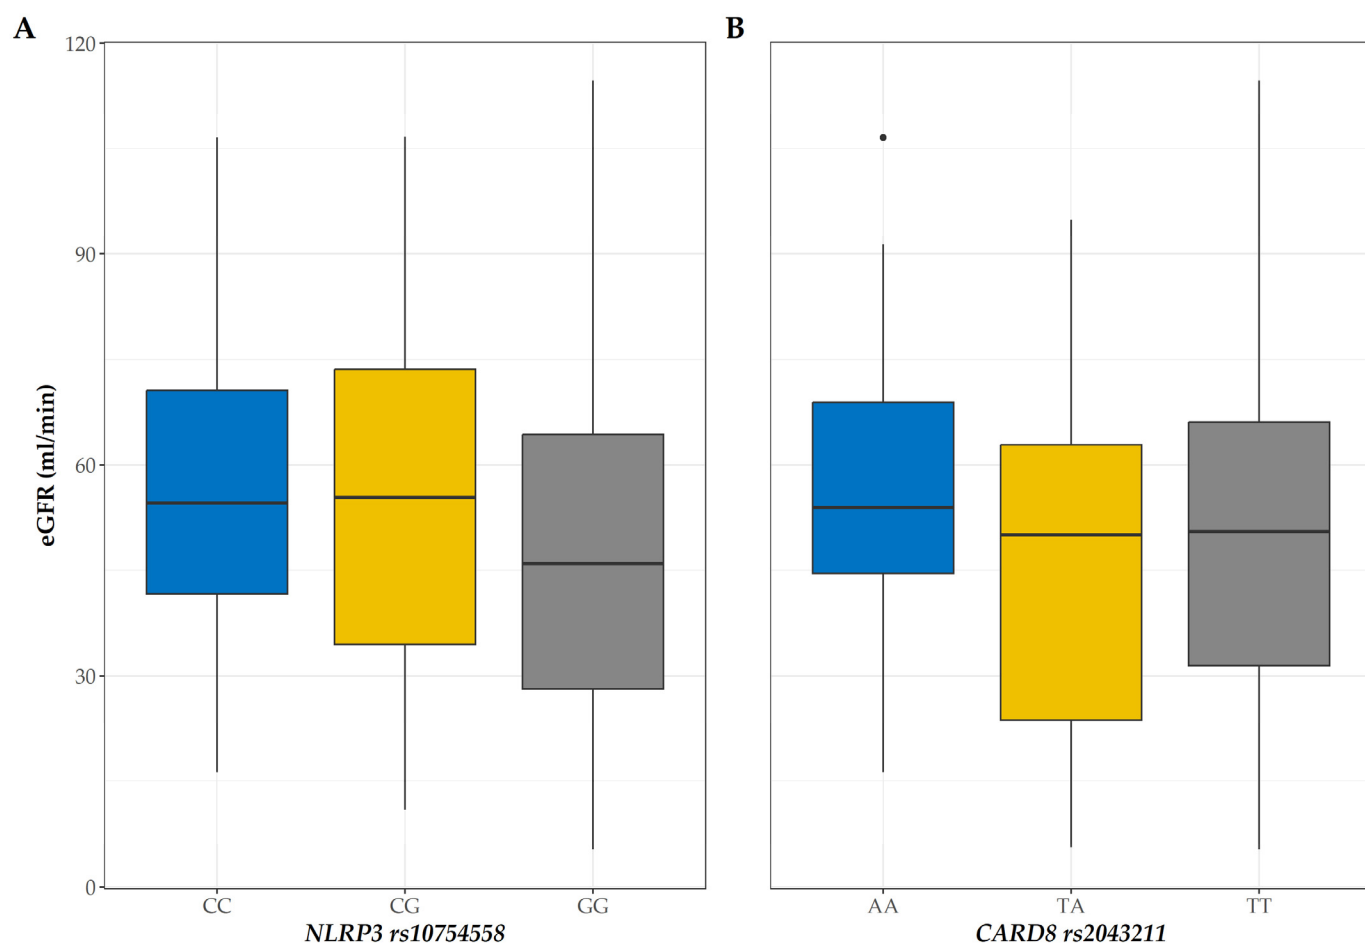

**Figure S1.** Association between eGFR levels and genotypes in KTRs.
